# Supplementary material for: YBX1 as an oncogenic factor in T-cell acute lymphoblastic leukemia
Source: PubMed Central journal article supplement — Blood Adv. 2023 Jun 22;7(17):4874–85. doi: 10.1182/bloodadvances.2022009648 (PMC10469076; doi:10.1182/bloodadvances.2022009648), 2023-06-22
Supplement: BLOODA_ADV-2022-009648-mmc1.pdf [file BLOODA_ADV-2022-009648-mmc1.pdf]

## Supplementary materials

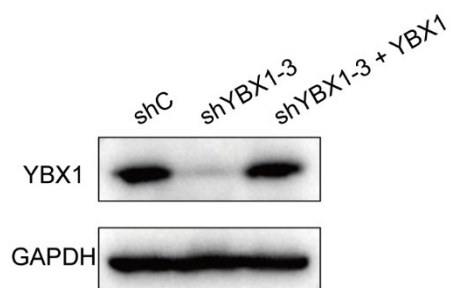

Supplementary Figure 1. Overexpression of YBX1 rescues the loss of YBX1 caused by shRNA.

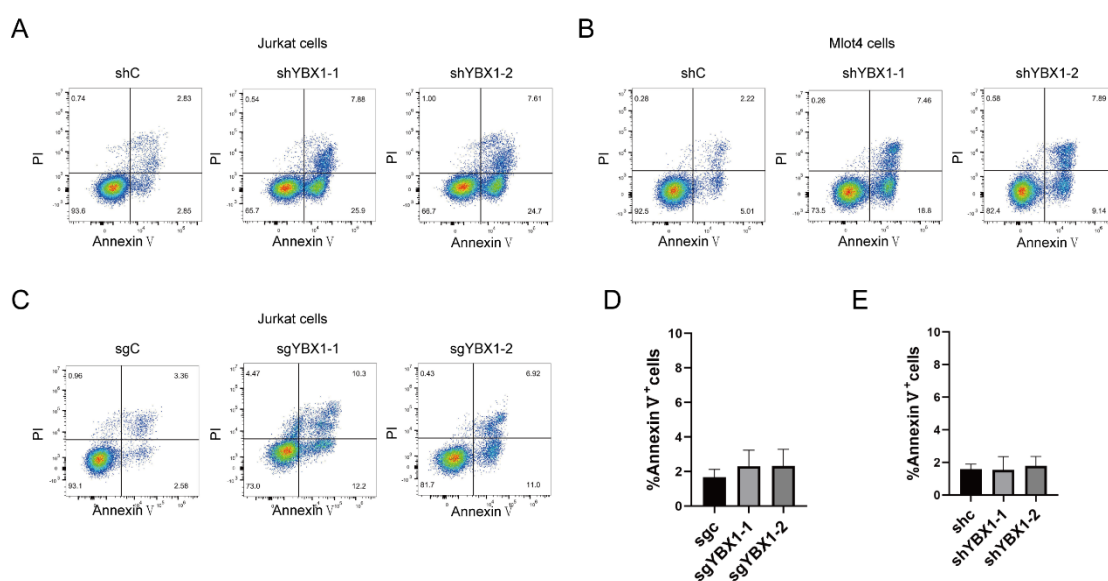

Supplementary Figure 2. YBX1 depletion induces cell apoptosis in Jurkat and Molt4 cells, but has little effect on apoptosis in HEK293T cells. (A-C) Representative images of apoptosis analysis by flow cytometry. (D, E) Cell apoptosis was examined in HEK293T cells with YBX1 knockout (D) or knockdown (E) by flow cytometry using Annexin V/PI staining.

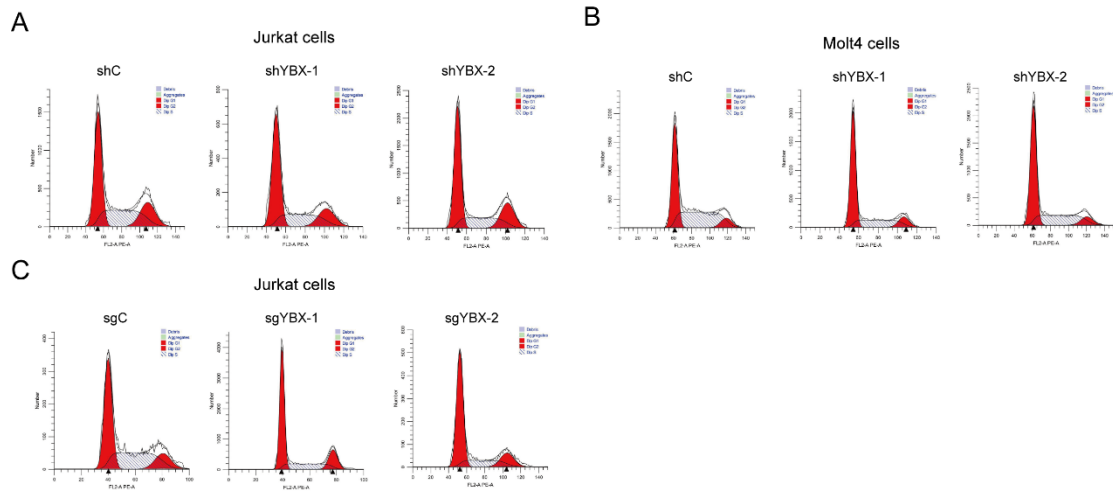

Supplementary Figure 3. Representative flow cytometry graphs of cell cycle.

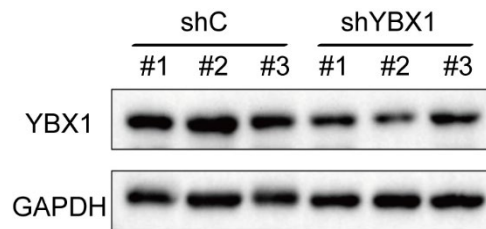

Supplementary Figure 4. YBX1 was knocked down in leukemia cells of NOTCH1-induced mice.

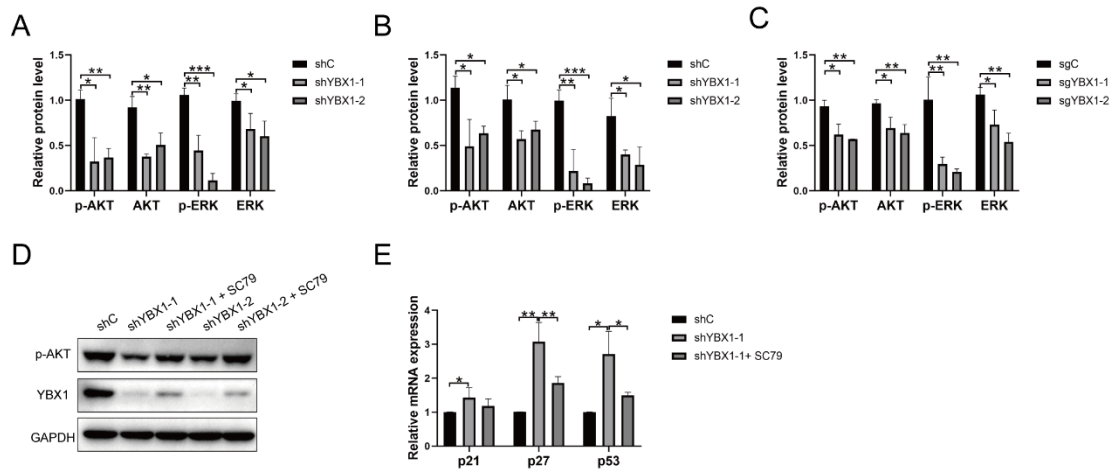

Supplementary Figure 5. YBX1 regulates AKT and ERK signaling pathways in T-ALL cells. (A-C) Statistical analysis of p-AKT, total AKT, p-ERK, total ERK in Jurkat (A, C) and Molt4 cells (B) was performed using band gray values by Image J. (D) The protein expression of p-AKT was analyzed by western blot in Jurkat cells with or without SC79 treatment. (E) The mRNA expression of cell cycle related genes was analyzed by qRT-PCR in Jurkat cells with or without SC79 treatment. \* $p < 0.05$ , \*\* $p < 0.01$ , \*\*\* $p < 0.001$

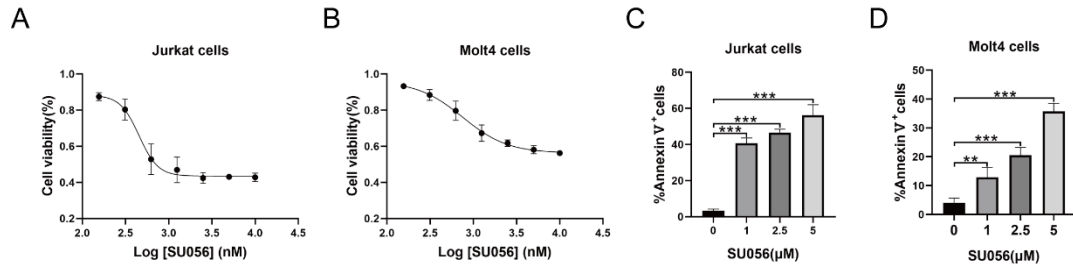

Supplementary Figure 6. SU56 has an antileukemic effect in T-ALL cell lines. (A, B) Cell viability analysis in Jurkat (A) and Molt4 (B) cells subjected to SU56 treatment at various concentrations for 24 h. (C, D) The percentage of cell apoptosis in Jurkat (C) and Molt4 (D) cells treated with SU56 for 24 h. \* $p < 0.05$ , \*\* $p < 0.01$ , \*\*\* $p < 0.001$ .

Supplemental table 1 shRNA, sgRNA sequences and RT-PCR sequences

|             |                           |                               |
|-------------|---------------------------|-------------------------------|
| YBX1-F      | TAGACGCTATCCACGTCGTAG     | qPCR primers for human genes  |
| YBX1-R      | ATCCCTCGTTCTTTTCCCCAC     |                               |
| Myc-F       | GTCAAGAGGGCGAACACACAAC    |                               |
| Myc-R       | TTGGACGGACAGGATGTATGC     |                               |
| Bim-F       | TAAGTTCTGAGTGTGACCGAGA    |                               |
| Bim-R       | GCTCTGTCTGTAGGGAGGTAGG    |                               |
| Bad-F       | CCAGAGTTTGAGCCGAGTGAGCAGG |                               |
| Bad-R       | TGGTGACTGGCGTCCCACAGGA    |                               |
| p18-F       | GGGGACCTAGAGCAACTTACT     |                               |
| p18-R       | CAGCGCAGTCCTTCCAAAT       |                               |
| p19-F       | AGTCCAGTCCATGACGCAG       |                               |
| p19-R       | ATCAGGCACGTTGACATCAGC     |                               |
| p21-F       | TGTCCGTCAGAACCCATGC       |                               |
| p21-R       | AAAGTCGAAGTTCCATCGCTC     |                               |
| p27-F       | TAATTGGGGCTCCGGCTAACT     |                               |
| p27-R       | TGCAGGTCGCTTCCTTATTCC     |                               |
| p53-F       | CAGCACATGACGGAGGTTGT      |                               |
| p53-R       | TCATCCAAATACTCCACACGC     |                               |
| FGFR1-F     | GTGGTCTTTCGGGGTGCT        |                               |
| FGFR1-R     | GGTGCAGTACTGGGCTTGT       |                               |
| VEGFA-F     | AGGGCAGAATCATCACGAAGT     |                               |
| VEGFA-R     | AGGGTCTCGATTGGATGGCA      |                               |
| B2M-F       | GAGGCTATCCAGCGTACTCCA     |                               |
| B2M-R       | CGGCAGGCATACTCATCTTTT     |                               |
| shhYBX1-1-F | AGCAGACCGTAACCATTATAG     | shRNA primers targeting hYBX1 |
| shhYBX1-1-R | CTATAATGGTTACGGTCTGCT     |                               |
| shhYBX1-2-F | CCAGTTCAAGGCAGTAAATAT     |                               |
| shhYBX1-2-R | ATATTTACTGCCTTGAAGTGG     |                               |
| shhYBX1-3-F | GCTTGACCCAGTCTACAAATA     |                               |
| shhYBX1-3-R | TATTTGTAGACTGGGTCAAGC     |                               |
| shmYBX1-F   | GAGAACCCTAAACCACAAGAT     |                               |
| shmYBX1-R   | ATCTTGTGGTTTAGGGTTCTC     |                               |
| sghYBX1-1-F | GTCTTGCAGGAATGACACCA      | Target sequences for sgRNA    |
| sghYBX1-1-R | TGGTGCATTCCTGCAAGAC       |                               |
| sghYBX1-2-F | GCAAATGTTACAGGTCCTGG      |                               |
| sghYBX1-2-R | CCAGGACCTGTAACATTTGC      |                               |
